# Supplementary material for: Efficacy and safety of telitacicept in patients with systemic lupus erythematosus: a multicentre, retrospective, real-world study
Source: HighWire-hosted journal article supplement (doi:10.1136/lupus-2023-001074), 2023-11-01
Supplement: lupus-2023-001074supp001_data_supplement.pdf [file lupus-2023-001074supp001_data_supplement.pdf]

## Supplementary materials

### Treatment with Telitacicept

The patients were treated with subcutaneous injection of 80mg telitacicept every week.

**Supplemental Table S1.** characteristics of lupus nephritis patients

| Parameters                                 | N (%)           |
|--------------------------------------------|-----------------|
| Age (years)                                | 32.74±12.46     |
| Sex, n (% female)                          | 30(88.2%)       |
| Disease duration (year)                    | 7.92(6.76)      |
| Skin                                       | 10(29.4%)       |
| Arthritis                                  | 9(26.5%)        |
| Serositis                                  | 5(14.7%)        |
| Central nervous system                     | 0(0.0%)         |
| Blood system                               | 24(70.6%)       |
| SLEDAI-2K                                  | 11.24(4.74)     |
| PGA                                        | 1.56(0.41)      |
| IgA                                        | 2.09(0.79)      |
| IgG                                        | 10.04(3.94)     |
| IgM                                        | 0.88(0.45)      |
| C3                                         | 0.65±0.30       |
| C4                                         | 0.14±0.08       |
| ANA positive                               | 31(91.2%)       |
| Anti-dsDNA                                 | 275.9 (271.5)   |
| Glucocorticoid use at baseline             | 20.82 (15.63)   |
| HCQ                                        | 31(91.2%)       |
| MMF                                        | 21(61.8%)       |
| CYC                                        | 7(20.6%)        |
| LEF                                        | 1(2.9%)         |
| THAL                                       | 0(0.0%)         |
| Biopsy                                     |                 |
| III                                        | 1(2.9%)         |
| IV                                         | 1(2.9%)         |
| III+V                                      | 3(8.8%)         |
| IV+V                                       | 7(20.6%)        |
| The ratio of urinary protein to creatinine | 1.20 (1.70)     |
| 24h protein qualification                  | 1323.5 (1565.7) |

**Supplemental Table S2.** Characteristics of patients with hematologic abnormalities

| Parameters                     | N (%)         |
|--------------------------------|---------------|
| Age (years)                    | 32.78±11.01   |
| Sex, n (% female)              | 35(97.2%)     |
| Disease duration (year)        | 5.88(6.24)    |
| Skin                           | 23(63.9%)     |
| Arthritis                      | 15(41.7%)     |
| Serositis                      | 7(19.4%)      |
| Central nervous system         | 2(5.6%)       |
| kidney                         | 18(50.0%)     |
| SLEDAI-2K                      | 10.67(4.89)   |
| PGA                            | 1.52(0.46)    |
| IgA                            | 2.37(0.99)    |
| IgG                            | 13.80 (7.66)  |
| IgM                            | 1.15(0.77)    |
| C3                             | 0.63(0.32)    |
| C4                             | 0.12(0.08)    |
| ANA positive                   | 34(94.4%)     |
| Anti-dsDNA                     | 382.0 (295.0) |
| Glucocorticoid use at baseline | 23.68 (14.68) |
| HCQ                            | 33(91.7%)     |
| MMF                            | 22(61.1%)     |
| LEF                            | 4(11.1%)      |
| CYC                            | 4(11.1%)      |
| THAL                           | 0(0.0%)       |
| WBC                            | 7.21(4.80)    |
| Hb                             | 102.5(24.1)   |
| PLT                            | 183.3(117.4)  |
| Leukopenia (n=9)               |               |
| proportion                     | 9(25.0%)      |
| WBC: mean±SD                   | 3.18±0.66     |
| Anemia (n=29)                  |               |
| proportion                     | 29(80.6%)     |
| Hb: mean ± SD                  | 93.52±15.59   |
| Thrombocytopenia (n=15)        |               |
| proportion                     | 15(41.7%)     |
| PLT: mean±SD                   | 100.8±40.54   |
